# Supplementary material
Source: PubMed Central journal article supplement (PMC3696644)
Supplement: supp_M113.462135_jbc.M113.462135-1.pdf [file supp_M113.462135_jbc.M113.462135-1.pdf]

**Table S1** Oligonucleotide primers used for mutagenesis insertion

| Primer        | primer sequence                           |
|---------------|-------------------------------------------|
| E141Q_foward  | 5' -GTGCCGTCATCAAGAAGCAAGCTACTTTGGGG-3'   |
| E141Q_reverse | 5' -CCCCAAGTAGCTTTGCTTCTTGATGACGGCAC-3'   |
| E141A_forward | 5' -GTGCCGTCATCAAGAAGGCAAGCTACTTTGGGG-3'  |
| E141A_reverse | 5' -CCCCAAGTAGCTTGCTTCTTGATGACGGCAC-3'    |
| E141D_forward | 5' -GTGCCGTCATCAAGAAGGACAGCTACTTTGGGG-3'  |
| E141D_reverse | 5' -CCCCAAGTAGCTGTCTTCTTGATGACGGCAC-3'    |
| E141N_forward | 5' -GTGCCGTCATCAAGAAGAACAGCTACTTTGGGG-3'  |
| E141N_reverse | 5' -CCCCAAGTAGCTGTTCTTCTTGATGACGGCAC-3'   |
| E162Q_forward | 5' -GGATTGATGCAGGTTCAACCTAACACGCGG-3'     |
| E162Q_reverse | 5' -CCGCGTGTTAGGTTGAACCTGCATCAATCC-3'     |
| E162A_forward | 5' -GGATTGATGCAGGTTGCACCTAACACGCGG-3'     |
| E162A_reverse | 5' -CCGCGTGTTAGGTGCAACCTGCATCAATCC-3'     |
| E162D_foward  | 5' -GGATTGATGCAGGTTGACCCTAACACGCGG-3'     |
| E162D_reverse | 5' -CCGCGTGTTAGGGTCAACCTGCATCAATCC-3'     |
| E162N_forward | 5' -GGATTGATGCAGGTTAACCTAACACGCGG-3'      |
| E162D_reverse | 5' -CCGCGTGTTAGGGTTAACCTGCATCAATCC-3'     |
| D226N_forward | 5' -GTATCCAGGAGCTACAACTCCTATGGCCGCCCG-3'  |
| D226N_reverse | 5' -CGGGCGGCCATAGGAGTTGTAGCTCCTGGATAC-3'  |
| D226A_forward | 5' -GTATCCAGGAGCTACAGCATCCTATGGCCGCCCG-3' |
| D226A_reverse | 5' -CGGGCGGCCATAGGATGCTGTAGCTCCTGGATAC-3' |

The mutation sites are underlined.

**Table S2** Crystallization conditions for five structures

| Structure name | Protein                                     | Reservoir solution                                                                                  | Soaking solution /soaking time                                      | Observed ligands at a substrate binding site |
|----------------|---------------------------------------------|-----------------------------------------------------------------------------------------------------|---------------------------------------------------------------------|----------------------------------------------|
| -              | SeMet<br>-labeled<br>Ra-ChiC <sub>cat</sub> | 8.3% (w/v) PEG3350<br>1.3% (v/v) isopropanol<br>33.3 mM CaCl <sub>2</sub><br>33.3 mM HEPES (pH7.5)  | none                                                                | -                                            |
| WT             | WT<br>Ra-ChiC <sub>cat</sub>                | 5% (w/v) PEG8000<br>167 mM (NH <sub>4</sub> ) <sub>3</sub> citrate/<br>ammonium hydroxide (pH 8.5)  | none                                                                | Glycerol ×1                                  |
| WT-NAG2        | WT<br>Ra-ChiC <sub>cat</sub>                | 8.3% (w/v) PEG3350<br>1.3% (v/v) isopropanol<br>33.3 mM CaCl <sub>2</sub><br>33.3 mM HEPES (pH7.5)  | Reservoir solution containing<br>40 mM (NAG) <sub>2</sub> /7 hours  | (NAG) <sub>2</sub> ×2                        |
| E141Q-NAG4     | E141Q<br>Ra-ChiC <sub>cat</sub>             | 11.1% (w/v) PEG3350<br>1.8% (v/v) isopropanol<br>44.4 mM CaCl <sub>2</sub><br>44.4 mM HEPES (pH7.5) | Reservoir solution containing<br>40 mM (NAG) <sub>4</sub> /30 hours | (NAG) <sub>4</sub> ×1                        |
| E162Q-HEPES    | E162Q<br>Ra-ChiC <sub>cat</sub>             | 11.1% (w/v) PEG3350<br>1.8% (v/v) isopropanol<br>44.4 mM CaCl <sub>2</sub><br>44.4 mM HEPES (pH7.5) | None                                                                | HEPES ×1                                     |
| E162Q-NAG2     | E162Q<br>Ra-ChiC <sub>cat</sub>             | 8.9% (w/v) PEG8000<br>8.9% (v/v) PEG400<br>44.4 mM MgCl <sub>2</sub><br>44.4 mM Tris-Cl (pH8.5)     | Reservoir solution containing<br>40 mM (NAG) <sub>2</sub> /20 hours | (NAG) <sub>2</sub> ×2                        |

**Table S3** Data collection statistics for MAD phasing

|                                            | SeMet-substituted Ra-ChiC <sub>cat</sub> -MAD |                            |                            |                            |
|--------------------------------------------|-----------------------------------------------|----------------------------|----------------------------|----------------------------|
|                                            | peak                                          | edge                       | remote (high)              | remote (low)               |
| <b>Data collection</b>                     |                                               |                            |                            |                            |
| Wavelength (Å)                             | 0.9789                                        | 0.9730                     | 0.9641                     | 0.9950                     |
| Space group                                | <i>P</i> 6 <sub>1</sub> 22                    | <i>P</i> 6 <sub>1</sub> 22 | <i>P</i> 6 <sub>1</sub> 22 | <i>P</i> 6 <sub>1</sub> 22 |
| Resolution (Å)                             | 2.20<br>(2.28-2.20)                           | 2.20<br>(2.28-2.20)        | 2.20<br>(2.28-2.20)        | 2.20<br>(2.28-2.20)        |
| Completeness (%)                           | 99.9 (100.0)                                  | 99.9 (100.0)               | 99.9 (100.0)               | 99.9 (100.0)               |
| <sup>a</sup> <i>R</i> <sub>merge</sub> (%) | 11.8 (52.8)                                   | 11.4 (55.2)                | 11.5 (58.0)                | 10.5 (57.7)                |
| < <i>I</i> /σ( <i>I</i> )>                 | 46.6 (9.7)                                    | 46.2 (9.3)                 | 45.4 (8.7)                 | 46.9 (8.6)                 |

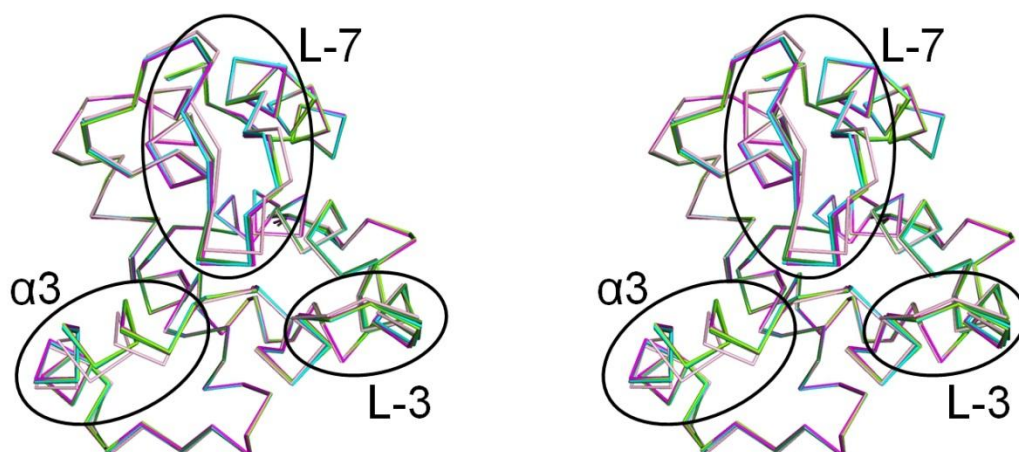

**Figure S1.** Stereo diagram of superposed Ra-ChiC<sub>cat</sub> structures are shown as wire models. WT, WT-NAG2, E141Q-NAG4, E162Q-HEPES, and E162Q-NAG2 structures are shown in dark green, light green, cyan, light magenta, and magenta, respectively.  $\alpha$ 3, L-3, and L-7 regions in which conformational changes are observed are indicated by ellipses.

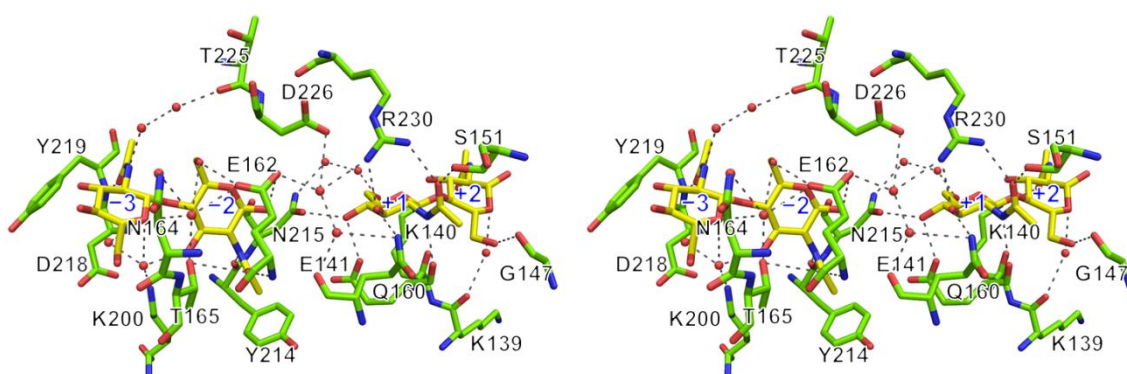

**Figure S2.** Stereo diagrams showing the NAG recognition mechanisms observed in the WT-NAG2 structure. The bound NAG residues are shown in yellow. Hydrogen bonds are shown as gray dashed lines.

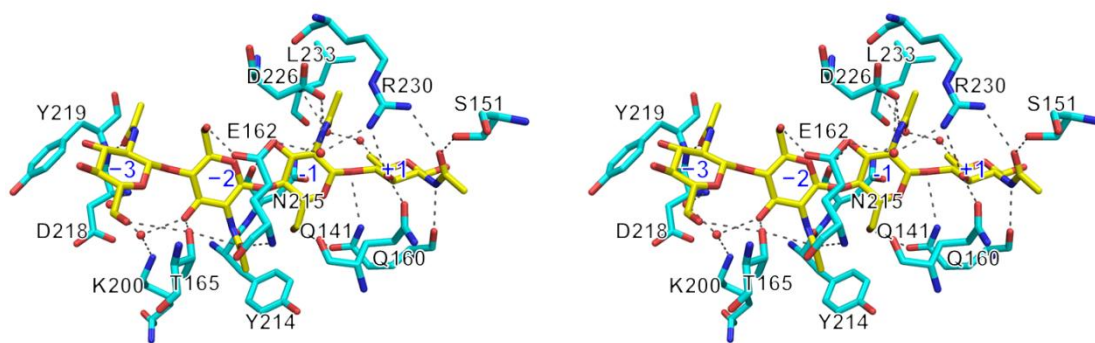

**Figure S3.** Stereo diagrams showing the NAG recognition mechanisms observed in the E141Q-NAG4 structure. The bound NAG residues are shown in yellow. Hydrogen bonds are shown as gray dashed lines.

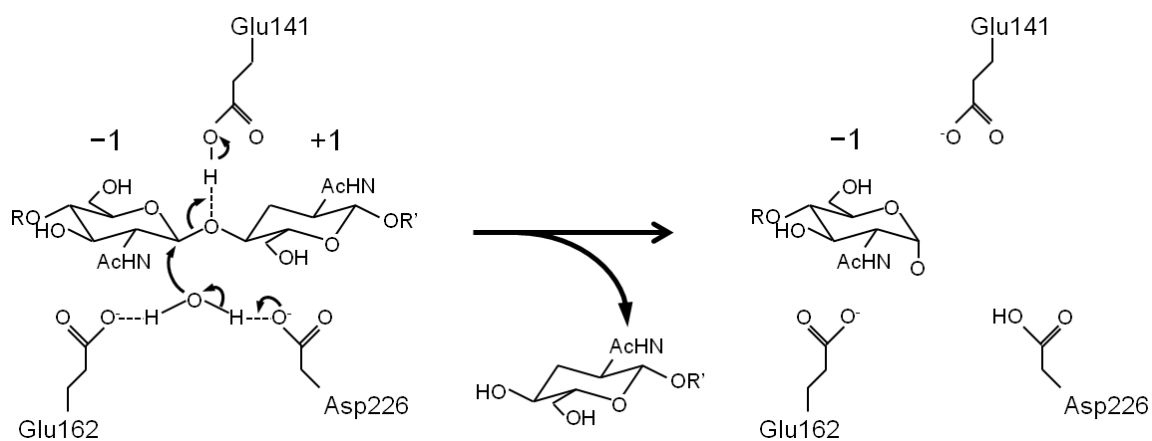

**Figure S4.** Catalytic mechanism of Ra-ChiC proposed based on structural and mutagenic analyses.
